# Topography of small vessel cerebrovascular disease differentially impacts cognitive domains across cognitive syndromes

Jia Dong James Wang<sup>1</sup>, Yi Jin Leow<sup>1,2</sup>, Ashwati Vipin<sup>2</sup>, Gurveen Kaur Sandhu<sup>2</sup>, Chao Dang<sup>4</sup>, Seyed Ehsan Saffari<sup>5</sup>, Nagaendran Kandiah<sup>2,3</sup>

<sup>1</sup>Lee Kong Chian School of Medicine, Nanyang Technological University, Singapore 308207, Singapore

<sup>2</sup>Dementia Research Centre (Singapore), Lee Kong Chian School of Medicine, Nanyang Technological University, Singapore 308207, Singapore

<sup>3</sup>Neuroscience and Mental Health Programme, Lee Kong Chian School of Medicine, Nanyang Technological University, Singapore 308232, Singapore

<sup>4</sup>The First Affiliated Hospital, Sun Yat-sen University, Guangzhou 510275, China

<sup>5</sup>Duke-NUS Medical School, National University of Singapore, Singapore 169608, Singapore

**Correspondence to:** Nagaendran Kandiah; email: [Nagaendran\\_Kandiah@ntu.edu.sg](mailto:Nagaendran_Kandiah@ntu.edu.sg)

**Keywords:** Alzheimer disease, dementia, Asian, cognition, dementia, vascular, cerebrovascular disorders

**Received:** March 24, 2025

**Accepted:** October 20, 2025

**Published:** November 17, 2025

**Copyright:** © 2025 Wang et al. This is an open access article distributed under the terms of the [Creative Commons Attribution License](https://creativecommons.org/licenses/by/4.0/) (CC BY 4.0), which permits unrestricted use, distribution, and reproduction in any medium, provided the original author and source are credited.

## ABSTRACT

**Introduction:** Dementia in Asia, presents distinct neuropathological features, with White Matter Hyperintensities (WMH) emerging as critical indicators of small vessel disease. WMH, classified into Deep White Matter Hyperintensities (DWMH), Periventricular Hyperintensities (PVH), and Fazekas-Total, exhibit high prevalence in Asian populations. Although WMH are prevalent and recognized indicators of small vessel disease, the domain-specific cognitive impact of WMH location remains unclear. We hypothesized that examining both cognitively normal (CN) and mild cognitive impairment (MCI) groups separately would clarify whether WMH topography exerts distinct effects at different stages of cognitive decline.

**Methods:** 430 participants were recruited, and a cross-sectional analysis performed. Eight domains of cognition were assessed: global cognition, learning/memory, language, executive function, attention, visuo-spatial, working memory, and processing speed. Correlation and stepwise regression (with False Discovery Rate correction) were performed. 217 participants were classified as Mild Cognitive Impairment (MCI) and 213 participants as Cognitively Normal (CN) as per National Institute on Aging-Alzheimer's Association criteria.

**Results:** In CN participants, higher Fazekas-Total was associated with impaired attention ( $p = 0.015$ ,  $\beta = 0.422$ ) while higher DWMH was associated with poorer learning and memory ( $p = 0.460$ ,  $\beta = 0.003$ ). In MCI, higher Fazekas-Total was associated with poorer learning and memory ( $p = 0.195$ ,  $\beta = 0.0313$ ).

**Discussion:** This study demonstrates that WMH burden—particularly DWMH—exerts differential domain-specific effects in CN versus MCI populations, underscoring the importance of WMH topography in early cognitive changes. Our results suggest that evaluating DWMH separately from overall WMH may refine clinical assessments and mechanistic understanding of vascular contributions to cognitive impairment. Future research should target upstream pathophysiological processes underlying region-specific WMH to improve early detection and intervention strategies.

## INTRODUCTION

Dementia is a growing global health concern, currently affecting 55 million people, with projections reaching 152.8 million by 2050 [1–3]. Asia bears 60% of this burden, driven by ageing populations, underscoring the need for deeper insights into the disease's biology, progression, and clinical manifestations. In this region, Alzheimer's disease and vascular dementia are the most prevalent forms [4], presenting complex challenges for public health and clinical care. Targeted research is essential to refine diagnosis, treatment, and prognosis, particularly in Asia, where the impact of dementia is rising rapidly due to disproportionately high burden of ageing populations.

White Matter Hyperintensities (WMH), which are white matter lesions visualized on Magnetic Resonance Imaging (MRI), are key markers of small vessel disease (SVD) [5]. SVD is a pathological process where vessel walls in small vessels like capillaries and arterioles are damaged, leading to decreased perfusion to the brain. SVD is prevalent in Asian populations and is strongly associated with both prodromal and clinical stages of dementia [4]. Current studies have shown a relatively high prevalence of SVD and therefore WMH in the Asian population, with some studies showing up to 36.6% of participants having WMH [6].

WMH is traditionally described as: Deep White Matter Hyperintensities (DWMH), Periventricular Hyperintensities (PVH) or Fazekas Total (DWMH and PVH) [7, 8]. Current studies have shown that higher WMH burden among patients were associated with poorer performance in global cognition, memory, and executive function [9]. In addition, a recent paper found that executive function, memory and visual memory were associated with WMH in participants with subjective cognitive decline (SCD). However, the association between WMH topography and performance in specific cognitive domains like social cognition remains unclear [10]. Specifically, there has been few studies quantifying the specific type of WMH (PVH or DWMH) and their individual impact on different domains of cognition, with the majority quantifying WMH as a combination of PVH and DWMH: Fazekas Total [9]. Therefore, we wish to investigate this in a Southeast Asian population, across broader groups comprising of cognitively normal to cognitively impaired.

Building on this knowledge gap, we aim to explore the differential impacts of Fazekas Total, DWMH, and PVH on specific cognitive domains—including global cognition, learning and memory, language, executive

function, attention, working memory, visuospatial skills, and processing speed—in a Southeast Asian prodromal dementia cohort. By examining both cognitively normal and cognitively impaired individuals, this study will provide a more nuanced view of how WMH topography influences cognition at varying stages of disease progression. Our findings could advance clinical decision-making for dementia risk assessment, diagnosis, and prognosis in Southeast Asia, thereby informing early intervention and potentially mitigating disease burden.

## METHODS

### Study design

We conducted a cross-sectional analysis using data from 430 participants enrolled in the Biomarkers and Cognition Study, Singapore BIOCIS. BIOCIS aims to characterize biomarker profiles, neuroimaging features, and neuropsychological and clinical outcomes within a multi-ethnic Southeast Asian cohort. Participants were recruited from community settings in Singapore between February 2022 and July 2023. For comprehensive details on the study's design, methodology, and procedures, please refer to the published BIOCIS Protocol [11].

### Participant recruitment

The study included participants with intact mental capacity and proficiency in either English or Mandarin. Eligibility was restricted to individuals classified as cognitively normal (CN) or diagnosed with mild cognitive impairment (MCI), provided they had undergone comprehensive neuropsychological assessments and MRI scans. Exclusion criteria encompassed a history of psychotic disorders, clinically significant neurological conditions such as stroke, severe systemic illnesses, alcoholism, or drug dependence within the past two years, as well as individuals with subjective cognitive decline (SCD).

The participants were classified as CN or MCI as per the National Institute on Aging-Alzheimer's Association (NIA-AA) criteria [12] and published literature [13].

Participants with a Clinical Dementia Rating (CDR) of 0, no subjective cognitive complaints, and a Montreal Cognitive Assessment (MoCA) score  $>26$  were classified as cognitively normal (CN). Participants who reported cognitive symptoms on the Subjective Memory Complaints Questionnaire (SMCQ) without functional deficits but showing objective cognitive impairments (performance  $>1.5$  SD below the mean on cognitive

tests), were classified as MCI. Participants with a CDR >1 or who exhibited functional deficits were classified as demented and excluded from the study.

### **Neuropsychological and demographics assessment protocol**

Cognition was assessed by trained raters utilizing standardized neuropsychological assessments which includes CDR Scale [14], Montreal Cognitive Assessment (MoCA) [15], Visual Cognitive Assessment Tool (VCAT) [16], Rey Auditory Verbal Learning Test (RAVLT) [17, 18], Rey–Osterrieth Complex Figure (ROCF) [19], Free and Cued Selective Reminding Test (FCSRT) [20], Test of Practical Judgment (TOP-J) [21], Colour Trails Test A (CTT-A) [22], Colour Trails Test B (CTT-B) [22], Trail Making Test B (TMT-B) [23], Semantic fluency [24], WAIS Digit Span Backwards [25], WAIS Digit Span Forward [26], WAIS Block Design Test [26] and Symbol Digit Modalities Test [27]. The test spanned across eight domains of cognition, which is shown in the Supplementary Figure 1.

Demographics such as age, gender and years of education were self-reported by participants. Additionally, a self-reported standardized lifestyle and behavioral questionnaires - Subjective Memory Complaints Questionnaire (SMCQ) was included [28].

### **Magnetic resonance imaging (MRI) protocol**

The participants underwent neuroimaging assessments using a 3T Siemens Prisma Fit (Siemens, Erlangen, Germany) MRI machine. The T1-weighted MPRAGE sequence was acquired with repetition time of 2000 ms, echo time 2.26 ms, inversion time 800 ms, flip angle 8, 1 mm slice thickness, 176 number of slices, and  $1 \times 1 \times 1$  mm voxel size. The T2-weighted FLAIR MRI sequence was acquired with repetition time of 7000 ms, echo time 394 ms, inversion time 2100 ms, flip angle 120, 1.56 mm slice thickness, 192 slices,  $0.8 \times 0.8 \times 1$  mm voxel size.

### **Rating for WMH features of PVH, DWMH and fazekas total**

To quantify the WMH features of PVH, DWMH and Fazekas Total, MRI visual ratings were performed on T1 and FLAIR MRI sequences by two trained raters blinded to diagnosis according to previously published methods [8] as shown in Supplementary Figure 2. DWMH were differentiated when lesions are more than 10 mm away from the lateral ventricles, in line of previous published literature [29].

For PVH, it was rated as “0” if hyperintensities were absent, “1” if hyperintensities showed “caps” or pencil-

thin lining (<5 mm), “2” if hyperintensities showed smooth “halo” (5 mm to <10 mm) and “3” if hyperintensities showed irregular periventricular signal extending into the deep white matter ( $\geq 10$  mm). For DWMH, it was rated as “0” if hyperintensities were absent, “1” if hyperintensities showed punctate foci (<5 mm), “2” if hyperintensities showed beginning confluence (5 mm to <10 mm) and “3” if hyperintensities showed large confluent areas ( $\geq 10$  mm) [8].

For PVH and DWMH, they were graded on a scale of 0–3 [30] for each hemisphere of the brain (right versus left), giving a total score ranging from 0–6 after summation of right and left scoring for the total PVH or DWMH scoring for each participant. The Fazekas Total score was calculated through summation of PVH and DWMH scoring, giving a total score ranging from 0–12.

### **Statistical analysis**

Statistical analysis of results was performed using R 4.2.2 version, Python 3.11 and IBM SPSS Statistics 26. Statistical significance was set as  $p < 0.05$ . Normality was tested using Q-Q plots [31] and Shapiro-Wilk (SW) tests [32] for the WMH features (PVH, DWMH and Fazekas Total) and neuropsychological assessments Supplementary Tables 1 and 2. Any timed tests had absolute value transformation for simplicity of interpretation.

### **Mapping of cognitive domains affected in CN and MCI groups**

Domain-level z-scores were calculated by taking the mean of standardized (z-transformed) raw test scores within each domain and outlined in a heatmap. This was conducted to compare the domains of cognition affected by WMH in the subsequent analysis. For tests that contribute to multiple domains (e.g., Colour Trails B for executive function and processing speed), the primary domain assignment was used in domain averaging, with secondary contributions noted in supplementary materials. We chose this mean-of-z approach to facilitate interpretability in heatmaps comparing group-level domain profiles.

### **Association between Neuropsychological test scores and WMH features**

Correlation testing was carried out between each WMH feature and neuropsychological assessment. If the data for both the specific WMH feature and neuropsychological assessment were normally distributed, a Pearson’s correlation was utilised [33]. If either of them were not normally distributed, a Spearman’s correlation was utilised [33]. For neuropsychological assessments which were time-based

like CTT-A, an absolute value correction was used for the correlation coefficients to enable comparability between different neuropsychological assessments. For inferential analyses (correlations and regressions), individual raw test scores were used rather than domain-level z-scores. This decision preserves test-level variability and statistical power while allowing adjustment for covariates. We clarify that domain z-scores were used descriptively (for heatmap visualization of average impairment), whereas raw scores were modeled for hypothesis testing of WMH-cognition associations.

### ***Stepwise regression of cognitive tests and WMH features***

A forward stepwise regression [34] was run for PVH, DWMH and Fazekas Total against every neuropsychological assessment that had significant correlation ( $p < 0.05$ ) in the previous correlation analysis. Previous neuropsychological assessments which showed negative correlation were corrected for comparison purposes (through negation of each assessment value).

This was to understand the relative contributions of each WMH feature (for PVH, DWMH and Fazekas Total) to impairment in the eight domains of cognition while controlling for age, gender and education years. The independent variables were WMH features (PVH, DWMH and Fazekas Total) and the dependent variables were the specific neuropsychological assessments.

Multiple-comparison correction was carried out using the Benjamini and Hochberg False Discovery Rate method [35] for all forward stepwise regression.  $\beta$ -values were analyzed to understand the degree of impairment of different domains of cognition contributed by each type of WMH. We chose stepwise regression as it offers a pragmatic approach to identify the most relevant WMH features contributing to cognitive domain performance while adjusting for demographic covariates like age, gender and education years. This approach is particularly useful in settings with multiple, potentially correlated predictors.

### **Data availability statement**

Data are not publicly available and may be made available by the corresponding author upon reasonable request.

## **RESULTS**

Overall, 430 participants were included in the final analysis. 217 participants were classified as MCI and

213 participants as CN. The mean, standard deviation and range of demographics (including gender, age, education years), WMH features (Fazekas Total, PVH and DWMH) and global cognitive tests (MoCA, VCAT) were summarized in Table 1. There were significant differences associated with the different subgroups of MCI and CN ( $p < 0.05$ ) in the demographics, neuroimaging, and cognitive test results Supplementary Table 3.

### **Cognitive domains affected in CN, SCD and MCI groups**

When comparing average z-scores, visuospatial, executive function and working memory ( $-0.070$ ) domain tests had the lowest average z-score in CN participants. In MCI participants, executive function ( $-1.11$ ) domain tests had the lowest average z-score as shown in Table 2.

### **Correlation analysis of cognitive tests and WMH features**

#### ***WMH features correlation with neuropsychological assessments (CNMCI participants)***

Fazekas Total, PVH and DWMH had strong correlation to processing speed in CN participants ( $Rho = 0.294, 0.225, 0.294$ ) as shown the supplementary material. Fazekas Total, PVH and DWMH had strong correlation to processing Speed in MCI participants ( $Rho = 0.278, 0.223, 0.281$ ) as seen in the Supplementary Table 4.

### **Stepwise regression of cognitive tests and MRI features**

Table 3 details the association between specific White Matter Hyperintensities features (Deep White Matter Hyperintensities, Periventricular Hyperintensities and Fazekas Total) and different domains of cognition, with the neuropsychological test utilized outlined. Only three domains of cognition performance tested were influenced by WMH and results were demonstrated in Table 3.

For CN participants, Fazekas Total mainly affected attention ( $p = 0.015, \beta = 0.422$ ). For DWMH, the greatest impact was on learning and memory ( $p = 0.003, \beta = 0.460$ ) impairment. For MCI participants, Fazekas Total was significantly associated with learning and memory ( $p = 0.0313, \beta = 0.195$ ) impairment, followed by executive function impairment ( $p = 0.0106, \beta = 0.08$ ).

A heatmap was created (Figure 1) to showcase the relative differences in domain of cognition affected in the general populations and contrasting it to when white matter hyperintensities or SVDs are accounted for.

**Table 1. Demographics, neuroimaging features, and cognitive test scores of the study population.**

|                                    |                                                                             | CN participants<br><i>n</i> = 213 | MCI participants<br><i>n</i> = 217 | <i>p</i> -value |
|------------------------------------|-----------------------------------------------------------------------------|-----------------------------------|------------------------------------|-----------------|
| <b>Demographics</b>                |                                                                             |                                   |                                    |                 |
| Age (years)                        |                                                                             | 57.3 ± 11.1                       | 64.4 ± 9.09                        | <0.001          |
| Gender (Male)                      |                                                                             | 109 (50.2%)                       | 90 (42.3%)                         | 0.013           |
| Years of education                 |                                                                             | 15.0 ± 3.35                       | 13.35 ± 4.13                       | <0.001          |
| <b>Neuroimaging Features</b>       |                                                                             |                                   |                                    |                 |
| Fazekas Total                      |                                                                             | 3.66 ± 2.71                       | 4.59 ± 2.91                        | 0.002           |
| Periventricular white matter       |                                                                             | 1.4 ± 1.38                        | 1.83 ± 1.48                        | 0.006           |
| Deep white matter hyperintensities |                                                                             | 2.25 ± 1.65                       | 2.76 ± 1.73                        | 0.005           |
| <b>Domain of cognition</b>         |                                                                             |                                   |                                    |                 |
| <b>Global</b>                      | MoCA                                                                        | 27.7 ± 1.33                       | 24.3 ± 2.86                        | <0.001          |
|                                    | VCAT                                                                        | 27.1 ± 2.48                       | 25.3 ± 3.42                        | <0.001          |
| <b>Learning and memory</b>         | Rey Auditory Verbal Learning Test (RAVLT) Delayed                           | 9.08 ± 3.50                       | 11.87 ± 2.75                       | <0.001          |
|                                    | Rey–Osterrieth Complex Figure (ROCF) Delayed                                | 17.88 ± 7.95                      | 22.36 ± 6.87                       | <0.001          |
|                                    | Free and Cued Selective Reminding Test (FCSRT) Learning Delayed Free Recall | 11.54 ± 2.78                      | 13.29 ± 2.00                       | <0.001          |
| <b>Language</b>                    | Semantic fluency                                                            | 16.81 ± 4.42                      | 20.11 ± 2.97                       | <0.001          |
|                                    | Test of Practical Judgment (TOP-J) B                                        | 15.59 ± 4.57                      | 17.50 ± 4.17                       | <0.001          |
| <b>Executive function</b>          | Trail Making Test B                                                         | 86.60 ± 52.81                     | 63.75 ± 31.29                      | <0.001          |
|                                    | Colour Trails B                                                             | 106.36 ± 43.60                    | 83.93 ± 30.00                      | <0.001          |
| <b>Attention</b>                   | WAIS Digit span Forward                                                     | 6.81 ± 1.33                       | 7.25 ± 1.47                        | 0.006           |
| <b>Working memory</b>              | WAIS Digit span Backwards                                                   | 4.78 ± 1.52                       | 5.71 ± 1.60                        | <0.001          |
| <b>Visuospatial</b>                | WAIS Block design                                                           | 34.73 ± 8.22                      | 38.32 ± 7.38                       | <0.001          |
| <b>Processing speed</b>            | Symbol Digit Modalities Test                                                | 62.92 ± 18.02                     | 75.38 ± 15.68                      | <0.001          |
|                                    | Colour Trails A                                                             | 52.94 ± 20.88                     | 43.32 ± 17.66                      | <0.001          |

Abbreviations: CN: Cognitively Normal; MCI: Mild Cognitive Impairment; MoCA: Montreal Cognitive Assessment; VCAT: Visual Cognitive Assessment Test. Data are presented as mean ± standard deviation unless otherwise stated. Bold values denote statistical significance at *p* < 0.05.

**Table 2. Average z-scores of various cognitive tests in between groups of CN and MCI.**

| Domains                    | Cognitive test                                          | CN (Mean ± SD) | MCI (Mean ± SD) |
|----------------------------|---------------------------------------------------------|----------------|-----------------|
| <b>Learning and memory</b> | Rey Auditory Verbal Learning Test                       | 0.10 ± 0.93    | −0.84 ± 1.21    |
|                            | Free and Cued Selective Reminding Test (FCSRT) Learning | 0.29 ± 0.77    | −0.42 ± 1.16    |
|                            | Rey–Osterrieth Complex Figure                           | −0.02 ± 1.01   | −0.66 ± 1.18    |
| <b>Language</b>            | Semantic fluency                                        | 0.16 ± 0.85    | −0.73 ± 1.22    |
|                            | Trail Making Test B                                     | −0.07 ± 1.39   | −1.11 ± 2.38    |
| <b>Executive function</b>  | Colour Trails B                                         | −0.07 ± 1.37   | −1.02 ± 1.92    |
|                            | Test of Practical Judgment B                            | 0.21 ± 0.90    | −0.20 ± 0.99    |
| <b>Working memory</b>      | WAIS Digit Span Backwards                               | −0.07 ± 0.95   | −0.73 ± 0.91    |
| <b>Attention</b>           | WAIS Digit Span Forward                                 | 0.14 ± 1.01    | −0.18 ± 0.97    |
| <b>Processing speed</b>    | Colour Trails A                                         | 0.10 ± 1.06    | −0.47 ± 1.14    |
|                            | Symbol Digit Modalities Test                            | 0.04 ± 0.95    | −0.67 ± 0.90    |
| <b>Visuospatial</b>        | WAIS Block Design                                       | −0.07 ± 1.06   | −0.52 ± 1.00    |

Average z-scores are shown within each group (CN and MCI). Abbreviations: CN: Cognitively Normal; MCI: Mild Cognitive Impairment.



**Table 3. A summary of stepwise regression results for cognitively normal and mild cognitive impairment participants.**

| Domains assessed    | Neuropsychological assessment | Fazekas total             |                     | PVH                      |                     | DWMH                     |                     |
|---------------------|-------------------------------|---------------------------|---------------------|--------------------------|---------------------|--------------------------|---------------------|
|                     |                               | $\beta$ -value            | Adjusted $p$ -value | $\beta$ -value           | Adjusted $p$ -value | $\beta$ -value           | Adjusted $p$ -value |
| Learning and memory | RAVLT                         | 0.210<br>(−0.011–0.410)   | 0.064               | 0.195<br>(−0.029–0.361)  | 0.052               | 0.460<br>(0.215–0.704)   | 0.003               |
| Executive function  | Trail Making Test             | 0.014<br>(−0.0011–0.0264) | 0.064               | NS                       | NS                  | NS                       | NS                  |
| Attention           | WAIS Digit span Forward       | 0.422<br>(0.133–0.710)    | 0.015               | 0.13<br>(−0.004–0.253)   | 0.052               | 0.038<br>(−0.005–0.071)  | 0.062               |
| Learning and memory | ROCF Immediate                | 0.195<br>(0.018–0.372)    | 0.0313              | 0.004<br>(−0.0006–0.010) | 0.114               | 0.0759<br>(−0.279–0.180) | 0.151               |
| Executive function  | Colour Trails B               | 0.08<br>(0.01–0.179)      | 0.0106              | NS                       | NS                  | NS                       | NS                  |
| Attention           | –                             | NS                        | NS                  | NS                       | NS                  | NS                       | NS                  |

For the domains of cognition that were overlapped in each of the neuropsychological assessment, the dominant domain was indicated via. Abbreviations: RAVLT: Rey Auditory Verbal Learning Test (RAVLT); ROCF Immediate: Rey–Osterrieth Complex Figure; NS: Non-significant.

## DISCUSSION

Our study explored the relationship between WMH and various cognitive domains across participants with different stages of cognitive impairment—CN and

MCI. The findings highlight significant associations between specific WMH features (Fazekas Total, PVH, DWMH) and cognitive function, demonstrating that different types of WMH influence distinct cognitive domains.

| CN      | Learning and memory | Language | Executive Function | Attention | Speed | Visuospatial | Working Memory |
|---------|---------------------|----------|--------------------|-----------|-------|--------------|----------------|
| Ref Grp |                     |          |                    |           |       |              |                |
| SVD+    |                     |          |                    |           |       |              |                |
| DWMH    |                     |          |                    |           |       |              |                |
|         |                     |          |                    |           |       |              |                |
| MCI     | Learning and memory | Language | Executive Function | Attention | Speed | Visuospatial | Working Memory |
| Ref Grp |                     |          |                    |           |       |              |                |
| SVD+    |                     |          |                    |           |       |              |                |
| DWMH    |                     |          |                    |           |       |              |                |

|             |  |                 |
|-------------|--|-----------------|
| Dark Green  |  | <50%            |
| Green       |  | 50%–100%        |
| Light Green |  | 100–300%        |
| Chartreuse  |  | >300%           |
| Yellow      |  | Non significant |

**Figure 1. A heatmap illustrating the relative impairment of various cognitive domains across different participant groups, including cognitively normal (CN) and mild cognitive impairment (MCI).** Comparisons are made across the general phenotype (Ref Grp), participants with white matter hyperintensities (WMH; SVD+ participants), and deep white matter hyperintensities (DWMH). The heatmap uses five distinct colours to depict the severity of impairment in each domain. Dark green represents the domain with the greatest impairment (i.e., the most affected domain in each group), while progressively lighter shades indicate less impairment relative to this maximum. Specifically, green indicates 50–100% of the maximal impairment, light green corresponds to 100–300%, chartreuse represents >300%, and yellow indicates non-significant differences.: dark green represents the domain with the greatest impairment, including any domain showing less than 50% of this impairment relative to the most affected domain. Green indicates impairments between 50–100%, light green corresponds to impairments from 100–300%, and chartreuse represents impairments exceeding 300%. Yellow represents domains that are non-significant. Abbreviations: CN: cognitively normal; MCI: mild cognitive impairment; WMH: white matter hyperintensities; SVD: small vessel disease.

## WMH and cognitive domains

The results indicate that WMH features, particularly DWMH, may differentially impact cognitive domains. DWMH was most strongly associated with learning and memory impairments, as observed in CN ( $\beta = 0.46$ ). The significant impact of DWMH on learning and memory suggests that WMH distribution patterns may hold greater clinical relevance than total burden, though causality cannot be established in this cross-sectional design. This is consistent with prior research, which suggests that white matter tracts, such as the superior longitudinal fasciculus and uncinate fasciculus, could be involved in learning and memory processes [36]. The diffused nature of DWMH may lead to more widespread cognitive disruptions, particularly in memory-related functions [37]. While we did not include tractography in this study, we propose this as a mechanistic hypothesis for future work. This could be clinically significant, as MRI can be used to individually characterize the burden of DWMH, allowing for tailored treatment plans.

## Specific WMH features in MCI, SCD, and CN

In participants with MCI, learning and memory impairment showed the strongest association with Fazekas Total WMH burden ( $\beta = 0.195$ ). This finding is consistent with literature indicating that memory deficits are central to MCI [38]. Furthermore, the strong relationship between WMH burden and learning and memory suggests that WMH could serve as a key imaging marker for identifying individuals at higher risk of progressing from MCI to Alzheimer's disease.

In CN participants, Fazekas Total was significantly associated with complex attention impairments ( $\beta = 0.422$ ). This suggests that attention deficits may emerge early in the dementia continuum, possibly reflecting the early stages of cognitive decline related to SVD. Attention impairment, as part of the attention-encoding-storage-retrieval framework, may be an initial manifestation of neurodegeneration, particularly in populations at high risk for dementia [39].

## Clinical implications

A comparison of Figure 1 reveals that cognitive domains were differentially affected in participants with and without WMH burden. For example, in MCI participants, executive function, working memory and visuospatial memory was most impaired when WMH was not considered, but when WMH burden was factored in, learning and memory emerged as the most affected domain. This finding aligns with existing literature suggesting that MCI in Southeast Asia may

present with greater executive function impairments, but that WMH burden shifts the cognitive impact toward memory deficits.

These findings have important clinical implications. The differential impact of WMH on specific cognitive domains highlights the need for more nuanced clinical phenotyping as shown in Figure 1. Assessing cognitive function with consideration of WMH burden allows for a more precise diagnosis and prognosis, as different cognitive domains may be influenced by WMH in various stages of cognitive decline. This targeted approach could guide more personalized interventions for patients at different stages of dementia, particularly in Southeast Asian populations. Moreover, clinicians could consider incorporating structured WMH assessments—separately rating DWMH and PVH—into routine MRI protocols for patients with suspected early cognitive impairment. Such neuroimaging-informed evaluations may support more precise risk stratification, facilitate early diagnosis, and inform targeted cognitive interventions tailored to domain-specific deficits. However, we did not define practical MRI thresholds for DWMH severity to guide such interventions, and current evidence for using WMH imaging to personalize cognitive stimulation therapy remains limited; future studies should assess feasibility and validate thresholds prospectively.

## Strengths and limitations

A key strength of this study is its population-based design, drawing participants from a community cohort in Singapore. This enhances the generalizability of our findings to real-world settings, as opposed to hospital-based samples. Moreover, analyzing multiple cognitive domains illuminates the differential effects of WMH features. Importantly, this is the first systematic analysis of the association between WMH subtypes (DWMH, PVH) and specific cognitive domains in a Southeast Asian population, directly addressing a regional research gap.

Nevertheless, certain limitations must be acknowledged. First, our cross-sectional design limits causal inferences (as WMH can co-occur with neurodegeneration), although a five-year longitudinal follow-up is underway to clarify temporal relationships and disease progression. We also acknowledge that MRI resolution differences (1.5T vs. 3T) could influence WMH detection and comparability. Moreover, we recognize that although WMH–cognition associations are well-studied, our contribution focuses on subtype-specific patterns in a Southeast Asian context rather than introducing new mechanistic biomarkers. Second, while this study centers on global WMH burden, future research would benefit from evaluating regional WMH

patterns to pinpoint topographic effects on specific cognitive domains. Additionally, the study did not control other variables that affect WMH such as vascular risk factors like hypertension, diabetes or lifestyle factors like exercise as the data was not collected, limiting casual interpretation of results. APOE4 status was also not recorded, therefore could not be analyzed. Another limitation of our study is the reliance on consensus-based Fazekas visual ratings without formal reporting of inter-rater reliability (e.g.,  $\kappa$  or ICC), which may introduce subjective variability. Additionally, Fazekas scores provide limited regional detail, potentially obscuring nuanced topographic effects of WMH on cognition. Future work should include reliability metrics and consider semi-quantitative volumetric analyses to improve precision. Furthermore, there was insufficient adjustment for education level beyond inclusion as a covariate, despite high educational heterogeneity in Southeast Asian populations, which may confound cognitive test performance. Lastly, there is potential variable selection bias due to the stepwise regression model utilized.

## Future directions

Future research should aim to compare the BIOCIS cohort longitudinally with international cohorts such as the Alzheimer's Disease Neuroimaging Initiative (ADNI) to evaluate the consistency of WMH-cognition associations across diverse populations. Additionally, examining the impact of specific WMH locations, particularly along key white matter tracts like the superior longitudinal fasciculus, could provide deeper insights into how lesion topography influences cognitive domains, shedding light on the underlying pathophysiology of dementia. Further investigation is also warranted to assess the role of perivascular spaces and their contributions to various cognitive domains, particularly within Southeast Asian populations [40]. Additionally, future studies should investigate upstream pathophysiological mechanisms underlying region-specific WMH development, such as blood-brain barrier dysfunction, chronic cerebral hypoperfusion, endothelial injury, and neuro-inflammation. Clarifying these mechanisms could enable biomarker discovery and guide targeted prevention strategies for small vessel disease-related cognitive decline. Finally, while this study focuses on a Southeast Asian cohort, the generalizability of these findings to non-Asian populations remains to be determined, given potential differences in small vessel disease prevalence, vascular risk profiles, and genetic factors.

## CONCLUSION

Our findings demonstrate that WMH burden differentially influences cognition depending on both

WMH subtype and stage of cognitive decline. Specifically, DWMH is closely linked with learning and memory impairment, whereas overall WMH burden (Fazekas Total) appears to more strongly affect attention in CN individuals and learning/memory in MCI. This nuanced view of WMH subtypes underscores the importance of precise neuroimaging assessments in early-stage dementia care. Such targeted evaluations could enable more personalized interventions and more accurate prognoses for populations at high risk of vascular-related cognitive impairment, particularly in Southeast Asia.

## AUTHOR CONTRIBUTIONS

Wang Jia Dong James contributed to the concept, design, drafting of the manuscript and statistical analyses. Associate Professor Nagaendran Kandiah, Leow Yi Jin and Ashwati Vipin contributed to the concept, editing of manuscript, and supervision of project. All other authors contributed to editing of the manuscript and data acquisition.

## CONFLICTS OF INTEREST

The authors declare no conflicts of interest related to this study.

## ETHICAL STATEMENT AND CONSENT

Informed consent was obtained from all patients according to the Declaration of Helsinki and local clinical research regulations, and procedures used in the study were in accordance with ethical guidelines. This study has been approved by the NTU Institutional Review Board (NTU-IRB-2021-1036).

## FUNDING

This project was funded by the Strategic Academic Initiative (SAI) Grant (SP1CLNT900-NTU-A630-PJ-03INP001400A630OOE01) from Lee Kong Chian School of Medicine, Nanyang Technological University, Singapore, Singapore Ministry of Education (MOE) Academic Research Fund (AcRF) Tier 3 Award MOE2017-T3-1-002 and National Medical Research Council, Singapore under its Clinician Scientist Award (MOH-CSAINV18nov-0007). This research project was supported by Nanyang Technological University under the URECA Undergraduate Research Programme. There is no conflict of interest to be declared.

## REFERENCES

1. Shin JH. Dementia Epidemiology Fact Sheet 2022. *Ann Rehabil Med.* 2022; 46:53–9.



- <https://doi.org/10.5535/arm.22027>  
PMID:35508924
2. Catindig JA, Venketasubramanian N, Ikram MK, Chen C. Epidemiology of dementia in Asia: insights on prevalence, trends and novel risk factors. *J Neurol Sci.* 2012; 321:11–6.  
<https://doi.org/10.1016/j.jns.2012.07.023>  
PMID:22877510
3. Li X, Feng X, Sun X, Hou N, Han F, Liu Y. Global, regional, and national burden of Alzheimer's disease and other dementias, 1990-2019. *Front Aging Neurosci.* 2022; 14:937486.  
<https://doi.org/10.3389/fnagi.2022.937486>  
PMID:36299608
4. Vipin A, Satish V, Saffari SE, Koh W, Lim L, Silva E, Nyu MM, Choong TM, Chua E, Lim L, Ng ASL, Chiew HJ, Ng KP, Kandiah N. Dementia in Southeast Asia: influence of onset-type, education, and cerebrovascular disease. *Alzheimers Res Ther.* 2021; 13:195.  
<https://doi.org/10.1186/s13195-021-00936-y>  
PMID:34847922
5. Chutinet A, Rost NS. White matter disease as a biomarker for long-term cerebrovascular disease and dementia. *Curr Treat Options Cardiovasc Med.* 2014; 16:292.  
<https://doi.org/10.1007/s11936-013-0292-z>  
PMID:24496967
6. Hilal S, Mok V, Youn YC, Wong A, Ikram MK, Chen CL. Prevalence, risk factors and consequences of cerebral small vessel diseases: data from three Asian countries. *J Neurol Neurosurg Psychiatry.* 2017; 88:669–74.  
<https://doi.org/10.1136/jnnp-2016-315324>  
PMID:28600443
7. Du B, Cao S, Liu Y, Wei Q, Zhang J, Chen C, Wang X, Mo Y, Nie J, Qiu B, Hu P, Wang K. Abnormal Degree Centrality in White Matter Hyperintensities: A Resting-State Functional Magnetic Resonance Imaging Study. *Front Psychiatry.* 2021; 12:684553.  
<https://doi.org/10.3389/fpsy.2021.684553>  
PMID:34326785
8. Wardlaw JM, Smith EE, Biessels GJ, Cordonnier C, Fazekas F, Frayne R, Lindley RI, O'Brien JT, Barkhof F, Benavente OR, Black SE, Brayne C, Breteler M, et al, and STandards for Reporting Vascular changes on nEuroimaging (STRIVE v1). Neuroimaging standards for research into small vessel disease and its contribution to ageing and neurodegeneration. *Lancet Neurol.* 2013; 12:822–38.  
[https://doi.org/10.1016/S1474-4422\(13\)70124-8](https://doi.org/10.1016/S1474-4422(13)70124-8)  
PMID:23867200
9. Guo W, Shi J. White matter hyperintensities volume and cognition: A meta-analysis. *Front Aging Neurosci.* 2022; 14:949763.  
<https://doi.org/10.3389/fnagi.2022.949763>  
PMID:36118701
10. Wang JDJ, Leow YJ, Vipin A, Kumar D, Kandiah N. Impact of White Matter Hyperintensities on domain-specific cognition in Southeast Asians. *Alzheimers Dement.* 2023; 19:e082267.  
<https://doi.org/https://doi.org/10.1002/alz.082267>
11. Leow YJ, Wang JDJ, Vipin A, Sandhu GK, Soo SA, Kumar D, Mohammed AA, Zailan FZB, Lee FPH, Ghildiyal S, Liew SY, Dang C, Tanoto P, et al. Biomarkers and Cognition Study, Singapore (BIOCIS): Protocol, Study Design, and Preliminary Findings. *J Prev Alzheimers Dis.* 2024; 11:1093–105.  
<https://doi.org/10.14283/jpad.2024.89>  
PMID:39044522
12. Jack CR Jr, Albert MS, Knopman DS, McKhann GM, Sperling RA, Carrillo MC, Thies B, Phelps CH. Introduction to the recommendations from the National Institute on Aging-Alzheimer's Association workgroups on diagnostic guidelines for Alzheimer's disease. *Alzheimers Dement.* 2011; 7:257–62.  
<https://doi.org/10.1016/j.jalz.2011.03.004>  
PMID:21514247
13. Winblad B, Palmer K, Kivipelto M, Jelic V, Fratiglioni L, Wahlund LO, Nordberg A, Bäckman L, Albert M, Almkvist O, Arai H, Basun H, Blennow K, et al. Mild cognitive impairment—beyond controversies, towards a consensus: report of the International Working Group on Mild Cognitive Impairment. *J Intern Med.* 2004; 256:240–6.  
<https://doi.org/10.1111/j.1365-2796.2004.01380.x>  
PMID:15324367
14. Morris JC. The Clinical Dementia Rating (CDR): current version and scoring rules. *Neurology.* 1993; 43:2412–4.  
<https://doi.org/10.1212/wnl.43.11.2412-a>  
PMID:8232972
15. Nasreddine ZS, Phillips NA, Bédirian V, Charbonneau S, Whitehead V, Collin I, Cummings JL, Chertkow H. The Montreal Cognitive Assessment, MoCA: a brief screening tool for mild cognitive impairment. *J Am Geriatr Soc.* 2005; 53:695–9.  
<https://doi.org/10.1111/j.1532-5415.2005.53221.x>  
PMID:15817019
16. Kandiah N, Zhang A, Bautista DC, Silva E, Ting SK, Ng A, Assam P. Early detection of dementia in multilingual populations: Visual Cognitive Assessment Test (VCAT). *J Neurol Neurosurg Psychiatry.* 2016; 87:156–60.  
<https://doi.org/10.1136/jnnp-2014-309647>  
PMID:25691617
17. McIntosh AM, Sharpe M, Lawrie SM. 9 - Research methods, statistics and evidence-based practice.

- In: Johnstone EC, Owens DC, Lawrie SM, McIntosh AM, Sharpe M, eds. *Companion to Psychiatric Studies* (Eighth Edition). Churchill Livingstone. 2010; 157–98.  
<https://doi.org/10.1016/B978-0-7020-3137-3.00009-7>
18. Owens DC, McKenna PJ, Davenport R. 10 - Clinical assessment: interviewing and examination. In: Johnstone EC, Owens DC, Lawrie SM, McIntosh AM, Sharpe M, eds. *Companion to Psychiatric Studies* (Eighth Edition). Churchill Livingstone. 2010; 199–26.
  19. Lewis TJ, Trempe CL. Chapter 3 - Diagnosis of Alzheimer's—Standard-of-Care. In: Lewis TJ, Trempe CL, eds. *The End of Alzheimer's* (Second Edition). Academic Press. 2017; 52–77.  
<https://doi.org/10.1016/B978-0-12-812112-2.00003-3>
  20. Grober E, Sanders AE, Hall C, Lipton RB. Free and cued selective reminding identifies very mild dementia in primary care. *Alzheimer Dis Assoc Disord*. 2010; 24:284–90.  
<https://doi.org/10.1097/WAD.0b013e3181cfc78b>  
PMID:20683186
  21. Rabin LA, Borgos MJ, Saykin AJ, Wishart HA, Crane PK, Nutter-Upham KE, Flashman LA. Judgment in older adults: development and psychometric evaluation of the Test of Practical Judgment (TOP-J). *J Clin Exp Neuropsychol*. 2007; 29:752–67.  
<https://doi.org/10.1080/13825580601025908>  
PMID:17896200
  22. D'Elia L, Satz P, Uchiyama CL, White T. *Color trails test*. PAR Odessa, FL. 1996.
  23. Butler M, Retzlaff PD, Vanderploeg R. Neuropsychological test usage. *Prof Psychol Res Pr*. 1991; 22:510–2.  
<https://doi.org/10.1037/0735-7028.22.6.510>
  24. Morris M. *WMS-IV: Wechsler Memory Scale 4th Edition: Administration and Scoring Manual*. Harcourt, Brace, & Company. 2009.  
[https://melissamorrisportfolio.weebly.com/uploads/4/7/7/3/47737847/wms-iv\\_presentation.pdf](https://melissamorrisportfolio.weebly.com/uploads/4/7/7/3/47737847/wms-iv_presentation.pdf)
  25. Holdnack JA, Millis S, Larrabee GJ, Iverson GL. Chapter 7 - Assessing Performance Validity with the ACS. In: Holdnack JA, Drozdick LW, Weiss LG, Iverson GL, eds. *WAIS-IV, WMS-IV, and ACS*. Academic Press. 2013; 331–65.  
<https://psycnet.apa.org/doi/10.1016/B978-0-12-386934-0.00007-9>
  26. Raiford SE, Coalson DL, Saklofske DH, Weiss LG. CHAPTER 2 - Practical Issues in WAIS-IV Administration and Scoring. In: Weiss LG, Saklofske DH, Coalson DL, Raiford SE, eds. *WAIS-IV Clinical Use and Interpretation*. Academic Press. 2010; 25–59.
  27. Soto T. *Processing Speed Index*. Springer New York. 2013; 2380–1.  
[https://doi.org/10.1007/978-1-4419-1698-3\\_246](https://doi.org/10.1007/978-1-4419-1698-3_246)
  28. Youn JC, Kim KW, Lee DY, Jhoo JH, Lee SB, Park JH, Choi EA, Choe JY, Jeong JW, Choo IH, Woo JI. Development of the Subjective Memory Complaints Questionnaire. *Dement Geriatr Cogn Disord*. 2009; 27:310–7.  
<https://doi.org/10.1159/000205512>  
PMID:19252402
  29. Ghaznawi R, Geerlings MI, Jaarsma-Coes MG, Zwartbol MH, Kuijf HJ, van der Graaf Y, Witkamp TD, Hendrikse J, de Bresser J. The association between lacunes and white matter hyperintensity features on MRI: The SMART-MR study. *J Cereb Blood Flow Metab*. 2019; 39:2486–96.  
<https://doi.org/10.1177/0271678X18800463>  
PMID:30204039
  30. Olazabal N, Priego G, Gonzalez-Torres M, Gaviria M. Updates in Vascular Dementia. *Heart and Mind*. 2017; 1:22.  
[https://doi.org/10.4103/hm.hm\\_4\\_16](https://doi.org/10.4103/hm.hm_4_16)
  31. Q-Q Plot (Quantile to Quantile Plot). Springer New York. 2008; 437–9.  
[https://doi.org/10.1007/978-0-387-32833-1\\_331](https://doi.org/10.1007/978-0-387-32833-1_331)
  32. Shapiro SS, Wilk MB. An analysis of variance test for normality (complete samples)<sup>†</sup>. *Biometrika*. 1965; 52:591–611.  
<https://doi.org/10.1093/biomet/52.3-4.591>
  33. de Winter JC, Gosling SD, Potter J. Comparing the Pearson and Spearman correlation coefficients across distributions and sample sizes: A tutorial using simulations and empirical data. *Psychol Methods*. 2016; 21:273–90.  
<https://doi.org/10.1037/met0000079>  
PMID:27213982
  34. Zhang Z. Variable selection with stepwise and best subset approaches. *Ann Transl Med*. 2016; 4:136.  
<https://doi.org/10.21037/atm.2016.03.35>  
PMID:27162786
  35. Benjamini Y, Hochberg Y. Controlling the false discovery rate: a practical and powerful approach to multiple testing. *J R Stat Soc Series B Stat Methodol*. 1995; 57:289–300.  
<https://www.jstor.org/stable/2346101>
  36. Rizvi B, Lao PJ, Colón J, Hale C, Igwe KC, Narkhede A, Budge M, Manly JJ, Schupf N, Brickman AM. Tract-defined regional white matter hyperintensities and memory. *Neuroimage Clin*. 2020; 25:102143.  
<https://doi.org/10.1016/j.nicl.2019.102143>  
PMID:31887716

37. Yang D, Huang L, Luo C, Li M, Qin R, Ma J, Shao P, Xu H, Zhang B, Xu Y, Zhang M. Impaired Structural Network Properties Caused by White Matter Hyperintensity Related to Cognitive Decline. *Front Neurol.* 2020; 11:250.  
<https://doi.org/10.3389/fneur.2020.00250>  
PMID:[32373044](https://pubmed.ncbi.nlm.nih.gov/32373044/)
38. Knopman DS, Petersen RC. Mild cognitive impairment and mild dementia: a clinical perspective. *Mayo Clin Proc.* 2014; 89:1452–9.  
<https://doi.org/10.1016/j.mayocp.2014.06.019>  
PMID:[25282431](https://pubmed.ncbi.nlm.nih.gov/25282431/)
39. Melton AW. Implications of short-term memory for a general theory of memory. *J Verbal Learning Verbal Behav.* 1963; 2:1–21.  
[https://doi.org/10.1016/S0022-5371\(63\)80063-8](https://doi.org/10.1016/S0022-5371(63)80063-8)
40. Wang JDJ, Leow YJ, Vipin A, Sandhu GK, Tanoto P, Azam MA, Zailan FZ, Lee FPH, Ghildiyal S, Liew SY, Tan IYZ, Kandiah N. Association of Blood-Based Biomarkers: GFAP, Amyloid 42/40 and Perivascular Spaces in Relation to Cognitive Domains in Vascular Cognitive Impairment Participants. *ALZ.* 2024.  
<https://alz.confex.com/alz/2024/meetingapp.cgi/Paper/92210>

SUPPLEMENTARY MATERIALS

Supplementary Figures

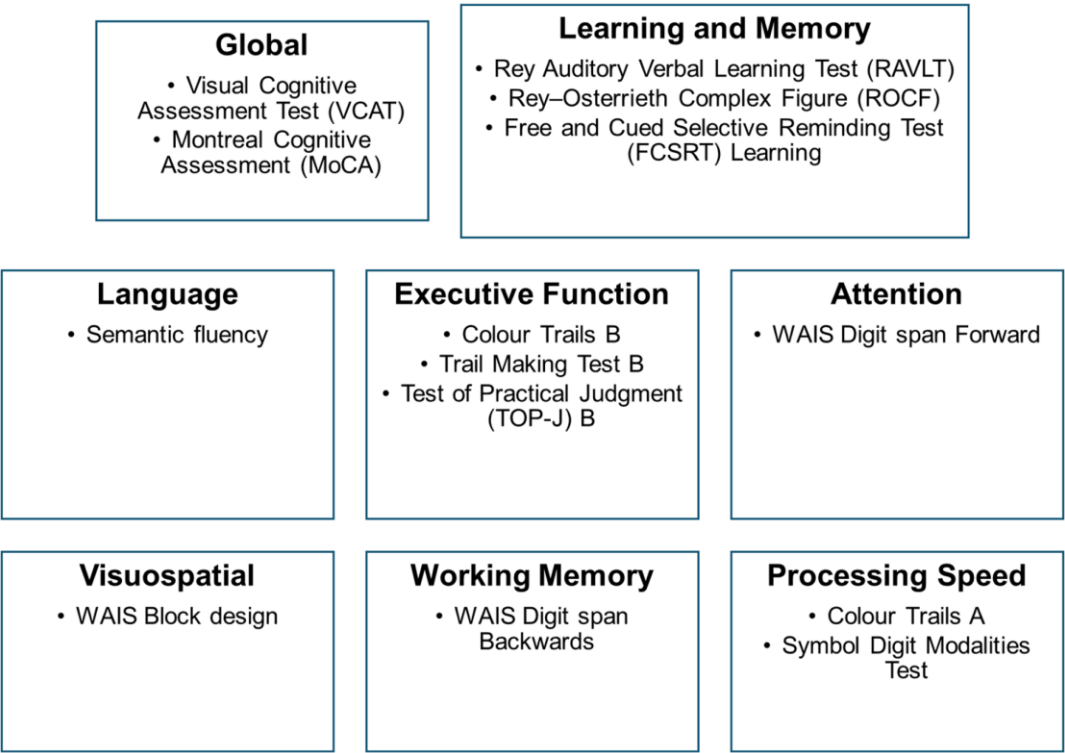

**Supplementary Figure 1. List of neuropsychological assessments (cognitive tests) and respective domains of cognition assessed.** When a cognitive test assesses multiple domains, the primary domain is displayed in regular text, while secondary domains are italicized and presented in grey.

WMH - PVH

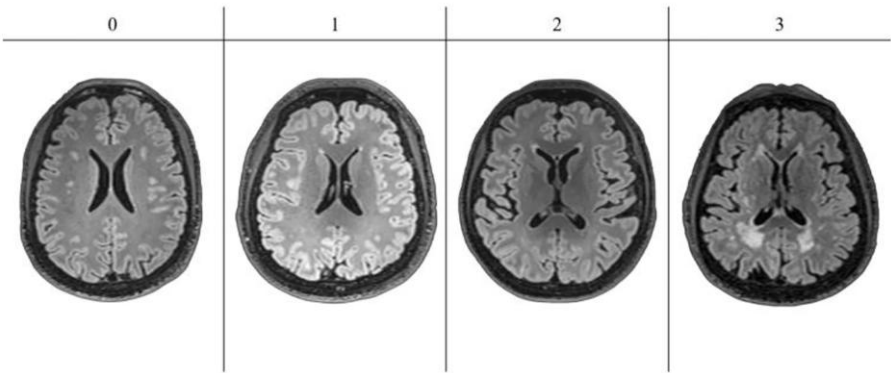

WMH - DWMH

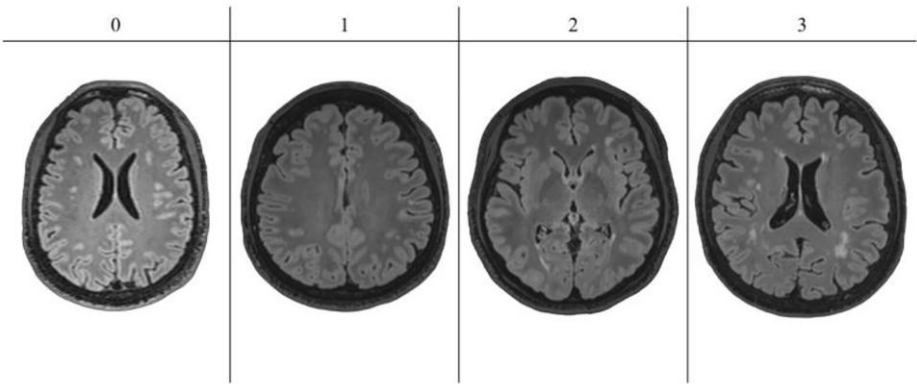

Normality Testing of Cognitive Tests and WMH features

Supplementary Figure 2. Illustration of PVH and DWMH severity and rating in MRI images.



## Supplementary Tables

**Supplementary Table 1. A summary of the Shapiro-Wilk tests results for each WMH feature (PVH, DWMH and Fazekas Total) in CN and MCI participants.**

| SW test <i>p</i> -value | PVH      | DWMH     | Fazekas Total |
|-------------------------|----------|----------|---------------|
| CN                      | 1.33E-15 | 3.99E-10 | 1.71E-09      |
| MCI                     | 4.84E-14 | 1.05E-07 | 1.22E-06      |

As all the WMH features data distribution were non-normal as shown above, a Spearman correlation was utilised for the subsequent analysis. Abbreviations: CN: Cognitively Normal; MCI: Mild Cognitive Impairment.

**Supplementary Table 2. A summary of the frequency of normal vs. non-normal Shapiro-Wilk tests results for each neuropsychological assessment.**

| SW test frequency table |            | Number of neuropsychological assessments |
|-------------------------|------------|------------------------------------------|
| CN                      | $P < 0.05$ | 14                                       |
|                         | $P > 0.05$ | 2                                        |
| MCI                     | $P < 0.05$ | 15                                       |
|                         | $P > 0.05$ | 1                                        |

Normality was tested for the rest of the neuropsychological assessments with a summary shown above, with the majority of the assessments showing non-normal distributions. A correlation analysis was done which is shown in Table 3. Abbreviations: CN: Cognitively Normal; MCI: Mild Cognitive Impairment.

**Supplementary Table 3. Summary of amnestic vs. non-amnestic MCI.**

| SW test frequency table |              | Number of participants |
|-------------------------|--------------|------------------------|
| MCI                     | Amnestic     | 73 (33.6%)             |
|                         | Non-amnestic | 144 (66.4%)            |

The number of amnestic MCI participants is lower than the current literature, likely because BIOCIS is a community-dwelling population.

**Supplementary Table 4. A summary of correlations between specific White Matter Hyperintensities features and different neuropsychological assessment by cognitive group.**

| Domains assessed    | Neuropsychological assessment | Cognitively normal    |                       |                       | Mild cognitive impairment |                       |                       |
|---------------------|-------------------------------|-----------------------|-----------------------|-----------------------|---------------------------|-----------------------|-----------------------|
|                     |                               | Fazekas total         | PVH                   | DWMH                  | Fazekas Total             | PVH                   | DWMH                  |
|                     |                               | Spearman Rho adjusted | Spearman Rho adjusted | Spearman Rho adjusted | Spearman Rho adjusted     | Spearman Rho adjusted | Spearman Rho adjusted |
| Global              | VCAT                          | 0.155                 | NS                    | 0.179                 | 0.215                     | 0.232                 | 0.183                 |
| Global              | MoCA                          | NS                    | NS                    | NS                    | 0.265                     | 0.164                 | 0.279                 |
| Learning and memory | ROCF Immediate                | 0.236                 | NS                    | 0.274                 | NS                        | 0.146                 | NS                    |
| Learning and memory | FCSRT Learning                | 0.183                 | NS                    | 0.212                 | 0.172                     | 0.225                 | NS                    |
| Learning and memory | RAVLT                         | NS                    | NS                    | 0.141                 | 0.165                     | NS                    | 0.162                 |
| Processing speed    | Colour Trails A               | 0.214                 | 0.148                 | 0.237                 | 0.152                     | 0.187                 | NS                    |

|                                                         |                              |       |       |       |       |       |       |
|---------------------------------------------------------|------------------------------|-------|-------|-------|-------|-------|-------|
| <b>Processing speed</b>                                 | Symbol Digit Modalities Test | 0.294 | 0.225 | 0.294 | 0.278 | 0.223 | 0.281 |
| <b>Executive function</b>                               | Colour Trail B               | 0.241 | 0.179 | 0.252 | 0.200 | 0.236 | 0.147 |
| <b>Executive function<sup>#</sup>, processing speed</b> | Trial Making Test B          | 0.250 | 0.173 | 0.261 | 0.164 | 0.178 | 0.135 |
| <b>Attention</b>                                        | WAIS Digit span Forward      | 0.193 | 0.144 | 0.198 | NS    | NS    | NS    |
| <b>Working memory</b>                                   | WAIS Digit span Backwards    | 0.169 | 0.171 | 0.147 | 0.191 | NS    | 0.191 |
| <b>Language</b>                                         | Semantic fluency             | 0.220 | 0.150 | 0.220 | NS    | NS    | NS    |
| <b>Visuospatial</b>                                     | WAIS Block design            | 0.242 | 0.165 | 0.255 | 0.174 | 0.214 | NS    |
| <b>Executive function</b>                               | TOP-J B                      | NS    | NS    | NS    | NS    | NS    | NS    |

Only correlations where  $p < 0.05$  were included. For tests that assessed various domains of cognition, the dominant domain was indicated by '<sup>#</sup>'. All reported values were corrected Rho values ( $p < 0.05$ ) through modulation. Abbreviations: VCAT: Visual Cognitive Assessment Test; MoCA: Montreal Cognitive Assessment; ROCF Immediate: Rey–Osterrieth Complex Figure; FCSRT Learning: Free and Cued Selective Reminding Test (FCSRT) Learning; RAVLT: Rey Auditory Verbal Learning Test (RAVLT); WMS-IV Logical Memory: Wechsler Memory Scale (WMS)-IV Logical Memory; TOP-J: Test of Practical Judgement; NS: Non-significant.
